# Supplementary material for: Catalytic hydrogenation of dimethyl itaconate in non-ionic microemulsions: influence of the size of micelle
Source: Royal Society of Chemistry journal article supplement (doi:10.1039/b905063a), 2009-01-01
Supplement: b905063a.pdf [file b905063a.pdf]

## Supplementary Information (4 pages)

### Catalytic Hydrogenation of Dimethyl Itaconate in Nonionic Microemulsions: Influence of the Size of Micelle

Juan Milano-Brusco,<sup>a</sup> Sylvain Prévost,<sup>b,c</sup> Dersy Lugo,<sup>b</sup> Michael Gradzielski<sup>b</sup>  
 and Reinhard Schomäcker<sup>\*a</sup>

<sup>a</sup> Department of Chemistry, TU Berlin, Secr. TC-8, Strasse des 17. Juni 124, 10623 Berlin, Germany.

<sup>b</sup> Stranski Laboratorium für Physikalische und Theoretische Chemie, Department of Chemistry, TU Berlin, Secr. TC-7, Strasse des 17. Juni 124, 10623 Berlin, Germany.

<sup>c</sup> Helmholtz Zentrum Berlin, Glienicker Strasse 100, 14109 Berlin, Germany.

**Table A** Original data of the cosurfactant partitioning study: molar percentage (%) of 1-pentanol concentrated in the aqueous phase of a biphasic system PEG 400/cyclohexane/water at 25°C.

| Sample | $m_{\text{H}_2\text{O}}$<br>/g | $m_{\text{C}_6\text{H}_{12}}$<br>/g | $m_{\text{PEG}400}$<br>/g | $m_{\text{C}_5\text{H}_{12}\text{O}}$<br>/g | Peak area  | $n_{\text{C}_5\text{H}_{12}\text{O}}^{\text{C}_6\text{H}_{12}}$<br>/mmol | $n_{\text{C}_5\text{H}_{12}\text{O}}^{\text{H}_2\text{O}}$<br>/mmol | % $_{\text{C}_5\text{H}_{12}\text{O}}^{\text{H}_2\text{O}}$ |
|--------|--------------------------------|-------------------------------------|---------------------------|---------------------------------------------|------------|--------------------------------------------------------------------------|---------------------------------------------------------------------|-------------------------------------------------------------|
| ME 1   | 0.43                           | 6.42                                | 0.47                      | 0.57                                        | 14061112.9 | 5.53                                                                     | 0.95                                                                | 14.62                                                       |
| ME 2   | 0.32                           | 6.52                                | 0.47                      | 0.57                                        | 14152069.2 | 5.64                                                                     | 0.81                                                                | 12.65                                                       |
| ME 3   | 0.21                           | 6.61                                | 0.47                      | 0.57                                        | 13696833.8 | 5.56                                                                     | 0.90                                                                | 13.89                                                       |
| ME 4   | 0.42                           | 6.27                                | 0.46                      | 0.74                                        | 18677920.0 | 7.04                                                                     | 1.38                                                                | 16.43                                                       |
| ME 5   | 0.31                           | 6.37                                | 0.46                      | 0.74                                        | 18678078.8 | 7.16                                                                     | 1.26                                                                | 15.00                                                       |
| ME 6   | 0.21                           | 6.46                                | 0.46                      | 0.74                                        | 17986361.8 | 7.00                                                                     | 1.40                                                                | 16.65                                                       |
| ME 7   | 0.41                           | 6.14                                | 0.45                      | 0.91                                        | 22927464.7 | 8.38                                                                     | 1.93                                                                | 18.75                                                       |
| ME 8   | 0.30                           | 6.23                                | 0.45                      | 0.91                                        | 22271529.3 | 8.27                                                                     | 2.02                                                                | 19.63                                                       |
| ME 9   | 0.20                           | 6.30                                | 0.45                      | 0.90                                        | 21859081.2 | 8.22                                                                     | 2.03                                                                | 19.77                                                       |
| ME 10  | 0.40                           | 6.00                                | 0.44                      | 1.07                                        | 27487785.3 | 9.75                                                                     | 2.35                                                                | 19.42                                                       |
| ME 11  | 0.30                           | 6.09                                | 0.44                      | 1.06                                        | 27145658.0 | 9.77                                                                     | 2.30                                                                | 19.03                                                       |
| ME 12  | 0.20                           | 6.18                                | 0.44                      | 1.06                                        | 26272920.4 | 9.61                                                                     | 2.44                                                                | 20.27                                                       |

**Table B** Original data of the cosurfactant partitioning study: molar percentage (%) of 1-pentanol concentrated in the aqueous phase of a biphasic system cyclohexane/water at 25°C.

| Sample | $m_{\text{H}_2\text{O}}$<br>/g | $m_{\text{C}_6\text{H}_{12}}$<br>/g | $m_{\text{C}_5\text{H}_{12}\text{O}}$<br>/g | Peak area  | $n_{\text{C}_5\text{H}_{12}\text{O}}^{\text{C}_6\text{H}_{12}}$<br>/mmol | $n_{\text{C}_5\text{H}_{12}\text{O}}^{\text{H}_2\text{O}}$<br>/mmol | % $_{\text{C}_5\text{H}_{12}\text{O}}^{\text{H}_2\text{O}}$ |
|--------|--------------------------------|-------------------------------------|---------------------------------------------|------------|--------------------------------------------------------------------------|---------------------------------------------------------------------|-------------------------------------------------------------|
| ME 1   | <b>0.43</b>                    | <b>6.42</b>                         | 0.57                                        | 14584854.0 | 5.72                                                                     | 0.76                                                                | 11.67                                                       |
| ME 2   | <b>0.32</b>                    | <b>6.52</b>                         | 0.57                                        | 14703252.0 | 5.85                                                                     | 0.61                                                                | 9.49                                                        |
| ME 3   | <b>0.21</b>                    | <b>6.61</b>                         | 0.57                                        | 14251234.0 | 5.76                                                                     | 0.69                                                                | 10.65                                                       |
| ME 4   | <b>0.42</b>                    | <b>6.27</b>                         | 0.74                                        | 19266890.0 | 7.25                                                                     | 1.17                                                                | 13.93                                                       |
| ME 5   | <b>0.31</b>                    | <b>6.37</b>                         | 0.74                                        | 19351388.0 | 7.41                                                                     | 1.02                                                                | 12.11                                                       |
| ME 6   | <b>0.21</b>                    | <b>6.46</b>                         | 0.74                                        | 18731613.0 | 7.27                                                                     | 1.12                                                                | 13.39                                                       |
| ME 7   | <b>0.41</b>                    | <b>6.14</b>                         | 0.91                                        | 24072494.0 | 8.78                                                                     | 1.53                                                                | 14.87                                                       |
| ME 8   | <b>0.30</b>                    | <b>6.23</b>                         | 0.91                                        | 23008840.0 | 8.54                                                                     | 1.75                                                                | 17.09                                                       |
| ME 9   | <b>0.20</b>                    | <b>6.30</b>                         | 0.90                                        | 23151346.0 | 8.68                                                                     | 1.56                                                                | 15.25                                                       |
| ME 10  | <b>0.40</b>                    | <b>6.00</b>                         | 1.07                                        | 27833765.0 | 9.87                                                                     | 2.23                                                                | 18.45                                                       |
| ME 11  | <b>0.30</b>                    | <b>6.09</b>                         | 1.06                                        | 27367684.0 | 9.85                                                                     | 2.22                                                                | 18.40                                                       |
| ME 12  | <b>0.20</b>                    | <b>6.17</b>                         | 1.06                                        | 27567972.0 | 10.06                                                                    | 1.99                                                                | 16.49                                                       |

**Table C** Original data of the cosurfactant partitioning study: molar percentage (%) of 1-pentanol concentrated in the aqueous phase of a biphasic system PEG 1000/cyclohexane/water at 25°C.

| Sample | $m_{\text{H}_2\text{O}}$<br>/g | $m_{\text{C}_6\text{H}_{12}}$<br>/g | $m_{\text{PEG}400}$<br>/g | $m_{\text{C}_5\text{H}_{12}\text{O}}$<br>/g | Peak area  | $n_{\text{C}_5\text{H}_{12}\text{O}}/\text{C}_6\text{H}_{12}$<br>/mmol | $n_{\text{C}_5\text{H}_{12}\text{O}}/\text{H}_2\text{O}$<br>mmol | % $_{\text{C}_5\text{H}_{12}\text{O}}\text{H}_2\text{O}$ |
|--------|--------------------------------|-------------------------------------|---------------------------|---------------------------------------------|------------|------------------------------------------------------------------------|------------------------------------------------------------------|----------------------------------------------------------|
| ME 1   | 0.43                           | 6.42                                | 1.18                      | 0.57                                        | 13008825.4 | 5.14                                                                   | 1.33                                                             | 20.56                                                    |
| ME 2   | 0.32                           | 6.52                                | 1.17                      | 0.57                                        | 12374776.9 | 4.99                                                                   | 1.48                                                             | 22.85                                                    |
| ME 3   | 0.21                           | 6.61                                | 1.17                      | 0.57                                        | 11234869.8 | 4.63                                                                   | 1.82                                                             | 28.25                                                    |
| ME 4   | 0.42                           | 6.27                                | 1.15                      | 0.74                                        | 16099999.6 | 6.12                                                                   | 2.30                                                             | 27.34                                                    |
| ME 5   | 0.31                           | 6.37                                | 1.15                      | 0.74                                        | 16336232.7 | 6.31                                                                   | 2.11                                                             | 25.08                                                    |
| ME 6   | 0.21                           | 6.46                                | 1.14                      | 0.74                                        | 15439785.9 | 6.06                                                                   | 2.33                                                             | 27.79                                                    |
| ME 7   | 0.41                           | 6.14                                | 1.12                      | 0.91                                        | 22140432.2 | 8.10                                                                   | 2.21                                                             | 21.42                                                    |
| ME 8   | 0.30                           | 6.23                                | 1.12                      | 0.91                                        | 21843548.8 | 8.12                                                                   | 2.17                                                             | 21.10                                                    |
| ME 9   | 0.20                           | 6.30                                | 1.12                      | 0.90                                        | 19194788.2 | 7.26                                                                   | 2.98                                                             | 29.09                                                    |
| ME 10  | 0.40                           | 6.00                                | 1.10                      | 1.07                                        | 25533580.8 | 9.08                                                                   | 3.02                                                             | 24.94                                                    |
| ME 11  | 0.30                           | 6.09                                | 1.10                      | 1.06                                        | 26195294.1 | 9.44                                                                   | 2.63                                                             | 21.76                                                    |
| ME 12  | 0.20                           | 6.18                                | 1.09                      | 1.06                                        | 22933571.5 | 8.43                                                                   | 3.62                                                             | 30.01                                                    |

**Table D** Absolute intensity of the SANS measurements from the Triton X-100 microemulsions, volume fraction of the polar components, contrast factor and volume of the Triton X-100 micelles calculated using the macroscopic scattering cross section, considering the limits of no and full penetration of pentanol in the core of the micelles.

| Sample | $\omega$ | $\delta$ | $I_0$<br>/cm <sup>-1</sup> | $\square_0$ | $\square_1$ | $\Delta p_0$<br>/cm <sup>-2</sup> | $\Delta p_1$<br>/cm <sup>-2</sup> | $V_{10,0}$<br>/nm <sup>-3</sup> | $V_{10,-1}$<br>/nm <sup>-3</sup> |
|--------|----------|----------|----------------------------|-------------|-------------|-----------------------------------|-----------------------------------|---------------------------------|----------------------------------|
| ME 1   | 20       | 0.75     | 138.61                     | 0.09        | 0.17        | -2.69E+10                         | -4.87E+10                         | 2046.17                         | 341.16                           |
| ME 2   | 15       | 0.75     | 37.14                      | 0.08        | 0.16        | -3.13E+10                         | -5.20E+10                         | 461.91                          | 85.86                            |
| ME 3   | 10       | 0.75     | 18.42                      | 0.07        | 0.15        | -3.67E+10                         | -5.57E+10                         | 191.24                          | 39.93                            |
| ME 4   | 20       | 1.00     | 55.11                      | 0.09        | 0.19        | -2.52E+10                         | -5.12E+10                         | 952.51                          | 109.19                           |
| ME 5   | 15       | 1.00     | 28.97                      | 0.08        | 0.18        | -2.96E+10                         | -5.42E+10                         | 412.88                          | 54.41                            |
| ME 6   | 10       | 1.00     | 15.15                      | 0.07        | 0.17        | -3.50E+10                         | -5.75E+10                         | 177.14                          | 26.94                            |
| ME 7   | 20       | 1.25     | 43.26                      | 0.09        | 0.21        | -2.35E+10                         | -5.32E+10                         | 884.29                          | 72.22                            |
| ME 8   | 15       | 1.25     | 25.24                      | 0.08        | 0.20        | -2.80E+10                         | -5.59E+10                         | 411.91                          | 40.12                            |
| ME 9   | 10       | 1.25     | 9.45                       | 0.07        | 0.19        | -3.34E+10                         | -5.88E+10                         | 124.41                          | 14.33                            |
| ME 10  | 20       | 1.50     | 34.60                      | 0.09        | 0.23        | -2.20E+10                         | -5.47E+10                         | 823.00                          | 50.05                            |
| ME 11  | 15       | 1.50     | 21.77                      | 0.08        | 0.22        | -2.64E+10                         | -5.72E+10                         | 408.25                          | 30.18                            |
| ME 12  | 10       | 1.50     | 11.38                      | 0.07        | 0.21        | -3.19E+10                         | -5.99E+10                         | 168.28                          | 15.13                            |

**Table E** Radius of gyration, radius of the micelles, volume of the corresponding homogeneous micelles with the assumption of spherical shape and volume ratio considering no penetration of pentanol in the core of the micelles.

| Sample | $R_{g\_1}$<br>/nm | $R\_1$<br>/nm | $V_{Sph}$<br>/nm <sup>3</sup> | $V_{Sph}/V_{10\_1}$ |
|--------|-------------------|---------------|-------------------------------|---------------------|
| ME 1   | 11.18             | 14.43         | 12588.94                      | 6.15                |
| ME 2   | 5.41              | 6.99          | 1429.35                       | 3.09                |
| ME 3   | 3.33              | 4.30          | 332.39                        | 1.74                |
| ME 4   | 7.09              | 9.16          | 3216.55                       | 3.38                |
| ME 5   | 5.04              | 6.50          | 1152.32                       | 2.79                |
| ME 6   | 3.24              | 4.18          | 306.02                        | 1.73                |
| ME 7   | 6.37              | 8.23          | 2332.92                       | 2.64                |
| ME 8   | 5.00              | 6.45          | 1125.36                       | 2.73                |
| ME 9   | 2.73              | 3.52          | 183.01                        | 1.47                |
| ME 10  | 5.59              | 7.22          | 1575.70                       | 1.91                |
| ME 11  | 4.37              | 5.65          | 754.56                        | 1.85                |
| ME 12  | 3.49              | 4.51          | 383.53                        | 2.28                |

**Table F** Radius of gyration, radius of the micelles, volume of the corresponding homogeneous micelles with the assumption of ellipsoidal shape and volume ratio considering no penetration of pentanol in the core of the micelles.

| Sample | $R_{g\_2}$<br>/nm | $a$<br>/nm | $b$<br>/nm | $V_{Ellip}$<br>/nm <sup>3</sup> | $V_{Ellip}/V_{10\_1}$ | <i>Ellipticity</i> |
|--------|-------------------|------------|------------|---------------------------------|-----------------------|--------------------|
| ME 1   | 4.00              | 5.16       | 23.90      | 2670.19                         | 1.30                  | 4.63               |
| ME 2   | 3.67              | 4.74       | 10.08      | 947.79                          | 2.05                  | 2.13               |
| ME 3   | 3.09              | 3.99       | 4.86       | 323.63                          | 1.69                  | 1.22               |
| ME 4   | 3.80              | 4.91       | 14.26      | 1437.86                         | 1.51                  | 2.91               |
| ME 5   | 3.57              | 4.61       | 9.19       | 817.48                          | 1.98                  | 1.99               |
| ME 6   | 2.89              | 3.73       | 4.96       | 289.13                          | 1.63                  | 1.33               |
| ME 7   | 3.40              | 4.39       | 12.83      | 1035.23                         | 1.17                  | 2.92               |
| ME 8   | 3.45              | 4.45       | 9.23       | 767.15                          | 1.86                  | 2.07               |
| ME 9   | 2.39              | 3.09       | 4.26       | 170.00                          | 1.37                  | 1.38               |
| ME 10  | 3.11              | 4.01       | 11.14      | 752.19                          | 0.91                  | 2.77               |
| ME 11  | 3.31              | 4.27       | 7.69       | 588.35                          | 1.44                  | 1.80               |
| ME 12  | 2.54              | 3.28       | 6.28       | 282.86                          | 1.68                  | 1.92               |

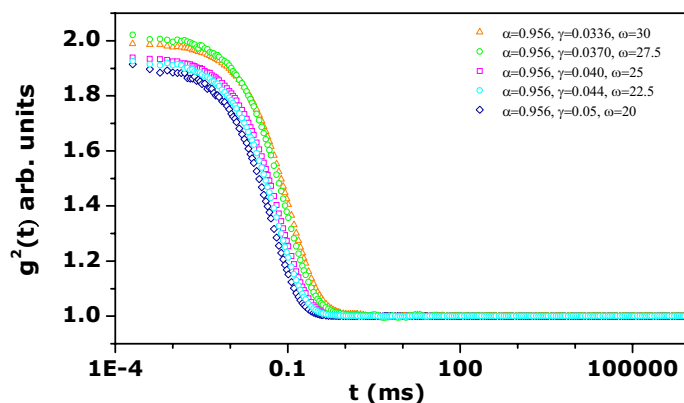

**Figure A** Autocorrelation functions  $g^2(\tau)$  of the DLS measurements of Igepal microemulsions with different concentrations of Igepal CA-520 ( $\gamma$ ) and constant cyclohexane-to-water ratios ( $\alpha = 0.956$ ) at  $25^\circ\text{C}$ .

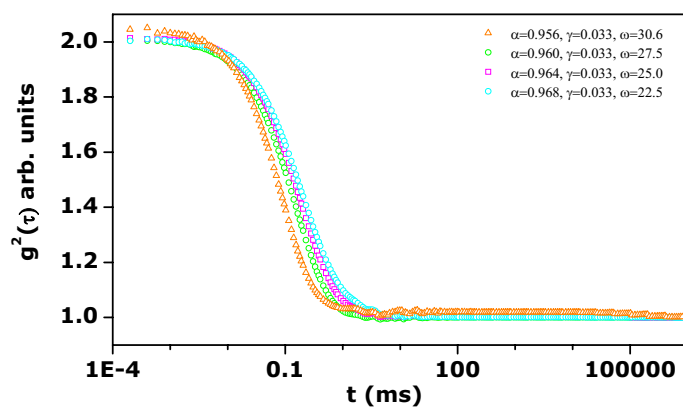

**Figure B** Autocorrelation functions  $g^2(\tau)$  of the DLS measurements of Igepal microemulsions with different cyclohexane-to-water ratios ( $\alpha$ ) and constant concentration of Igepal CA-520 ( $\gamma = 0.033$ ) at  $25^\circ\text{C}$ .
